# Supplementary material
Source: Springer Nature journal article supplement (https://www.springermedizin.de/resource/supplementary/12939_2013_461_MOESM4_ESM.pdf/9551224)

**A** Per Capita Total Health Exp.,  
Between 1st and 4th NDPs--Rural

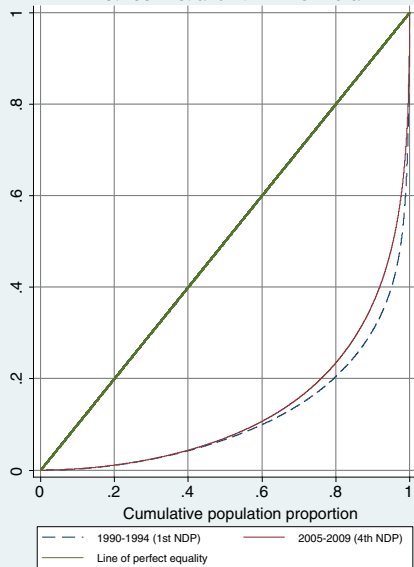

**B** Per Capita Total Health Exp.,  
Between 1st and 4th NDPs--Urban

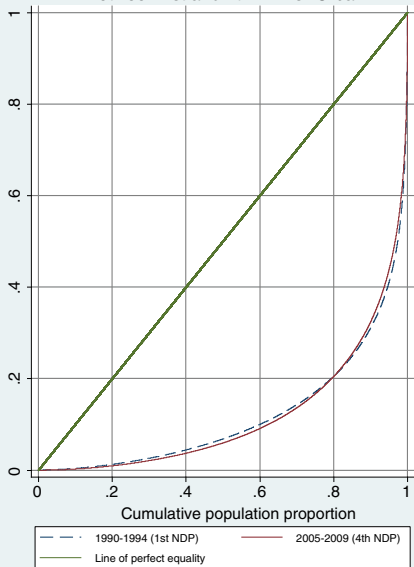

Supplement: MOESM4 [file 9551224]
